# Supplementary material for: Agronomic Evaluation of the Results of Selection within Late-Maturing Dactylis glomerata Populations
Source: MDPI journal article supplement (doi:10.3390/agronomy11071362), 2021-07-03
Supplement: s1 [file s1]

**Table S1.** Mean values corresponding to 58 orchardgrass families and five commercial cultivars evaluated in 2013 and 2014 at Lewiston and Millville, UT under frequent and infrequent harvest frequencies. Means are across years, location, and harvest frequencies (O) or within locations and across years and harvest frequencies – Lewiston (L) and Millville (P). Traits are maturity (M; 1 – very late to 5 – very early), HDM (H; Mg ha<sup>-1</sup>), CP (P; g kg<sup>-1</sup>), IVTD (D; g kg<sup>-1</sup>), NDFD (F; g kg<sup>-1</sup>), and WSC (C; g kg<sup>-1</sup>). Values in the statistically highest grouping for each trait are underlined.

| Family      | O-M        | L-M        | P-M        | O-H         | L-H         | P-H         | O-P        | L-P        | P-P        | O-D        | L-D        | P-D        | O-F        | L-F        | P-F        | O-C       | L-C | P-C |
|-------------|------------|------------|------------|-------------|-------------|-------------|------------|------------|------------|------------|------------|------------|------------|------------|------------|-----------|-----|-----|
| ACKillarney | 2.9        | 2.6        | 3.2        | <u>19.9</u> | <u>26.5</u> | 13.4        | 180        | <u>176</u> | 183        | 842        | 833        | 851        | <u>751</u> | <u>735</u> | <b>770</b> | 58        | 56  | 60  |
| ACKootenary | 2.0        | 1.8        | <u>2.1</u> | 15.6        | 18.3        | 13.2        | <u>190</u> | <u>181</u> | <u>200</u> | <u>848</u> | <u>838</u> | <u>859</u> | <u>748</u> | <u>741</u> | <b>754</b> | 55        | 50  | 60  |
| Baraula     | <u>1.6</u> | 1.6        | <u>1.6</u> | 18.4        | 23.7        | 13.3        | 177        | 163        | 192        | 841        | 821        | <u>861</u> | 712        | 706        | 717        | 56        | 50  | 62  |
| Intensive   | 2.1        | 2.1        | <u>2.0</u> | 19.1        | 23.4        | <u>14.8</u> | 179        | 166        | 191        | 838        | 819        | 857        | 719        | 714        | 723        | 58        | 49  | 66  |
| Latar       | 3.2        | 2.7        | 3.8        | 17.0        | 24.9        | 9.1         | <u>187</u> | 166        | <u>208</u> | 844        | 819        | <u>869</u> | <u>743</u> | 711        | <b>774</b> | 58        | 51  | 65  |
| I3_1        | 3.6        | 2.7        | 4.8        | <u>20.2</u> | 24.0        | <u>17.0</u> | 170        | 173        | 169        | 840        | 827        | 853        | 734        | 733        | 740        | 59        | 56  | 62  |
| I3_2        | 3.4        | 2.2        | 4.7        | <u>20.8</u> | <u>25.4</u> | <u>16.1</u> | 177        | 170        | 184        | 842        | 824        | <u>859</u> | 727        | 714        | 739        | 58        | 50  | 67  |
| I3_3        | 4.1        | 2.9        | 5.2        | 19.1        | <u>25.4</u> | 12.8        | <u>181</u> | 168        | <u>195</u> | <u>850</u> | 832        | <u>869</u> | 724        | 713        | 736        | <b>62</b> | 52  | 72  |
| I5_1        | 2.4        | 2.6        | <u>2.1</u> | 19.3        | 22.2        | <u>16.4</u> | <u>183</u> | 174        | <u>193</u> | 840        | 829        | 851        | 717        | 700        | 732        | 56        | 51  | 61  |
| I5_2        | 2.3        | 2.1        | <u>2.6</u> | 19.1        | 22.6        | <u>15.2</u> | 179        | 166        | 190        | 838        | 825        | 850        | 719        | 719        | 725        | 53        | 48  | 56  |
| I5_3        | 3.4        | 3.3        | 3.6        | 19.2        | 23.9        | 14.3        | 180        | 174        | 188        | 836        | 817        | 854        | 729        | <u>736</u> | 721        | 51        | 45  | 57  |
| I5_4        | 3.5        | 2.8        | 4.0        | <u>19.7</u> | <u>25.2</u> | 14.2        | 176        | 162        | 190        | 835        | 819        | 851        | 726        | 704        | <b>749</b> | 57        | 60  | 55  |
| LaS_1       | 2.8        | 2.5        | 2.8        | 18.8        | 22.2        | <u>15.2</u> | <u>181</u> | 171        | 188        | 838        | 820        | 857        | 705        | 688        | 720        | 52        | 40  | 65  |
| LaS_2       | 3.1        | 3.3        | 3.3        | <u>20.7</u> | <u>25.5</u> | <u>15.8</u> | 175        | 166        | 185        | 831        | 815        | 847        | 728        | 724        | 736        | 54        | 50  | 57  |
| LaS_3       | 2.6        | 2.1        | 3.3        | 19.4        | 22.5        | <u>16.7</u> | 176        | 166        | 186        | 833        | 818        | 848        | 713        | 714        | 710        | 52        | 48  | 57  |
| LaS_4       | 3.9        | 3.0        | 4.8        | <u>19.9</u> | <u>25.5</u> | 14.1        | <u>182</u> | 174        | 190        | 839        | 826        | 852        | 714        | 708        | 720        | 59        | 53  | 65  |
| LaS_5       | 2.5        | 2.7        | <u>2.4</u> | 19.2        | <u>25.0</u> | 13.5        | 176        | 166        | 184        | 843        | 827        | <u>859</u> | 723        | 710        | 739        | <b>63</b> | 56  | 70  |
| LaS_6       | <u>1.5</u> | <u>1.0</u> | <u>2.0</u> | <u>20.4</u> | <u>26.3</u> | 14.3        | 178        | 168        | 186        | 843        | 824        | <u>862</u> | <u>742</u> | 717        | <b>767</b> | 60        | 51  | 70  |
| LaS_7       | 3.3        | 2.7        | 4.0        | <u>20.4</u> | <u>24.5</u> | <u>17.0</u> | 175        | 169        | 183        | 836        | 825        | 847        | 731        | 735        | 723        | 52        | 49  | 57  |
| LaS_8       | 2.2        | <u>1.1</u> | 2.8        | 19.3        | 23.4        | <u>15.3</u> | 175        | 162        | 186        | 839        | 819        | <u>859</u> | 726        | 722        | 730        | 57        | 48  | 66  |
| P5_1        | <u>1.9</u> | 1.7        | <u>2.4</u> | 18.5        | <u>24.5</u> | 12.4        | 179        | <u>177</u> | 180        | <u>848</u> | 832        | <u>864</u> | 737        | 729        | <b>748</b> | <b>66</b> | 57  | 75  |
| P5_10       | <u>1.4</u> | <u>0.6</u> | <u>2.2</u> | 17.6        | 21.8        | 13.4        | 174        | 168        | 181        | 838        | 819        | 857        | 707        | 694        | 721        | <b>64</b> | 55  | 71  |
| P5_11       | 2.6        | 2.1        | 2.7        | 17.5        | 22.8        | 12.7        | 177        | 164        | 189        | 843        | 826        | <u>860</u> | <u>754</u> | <u>751</u> | <b>759</b> | 56        | 52  | 60  |
| P5_12       | <u>1.5</u> | 1.1        | 1.7        | 17.2        | 20.7        | 13.7        | <u>184</u> | <u>175</u> | 191        | <u>849</u> | <u>846</u> | 853        | <u>747</u> | <u>760</u> | 732        | 56        | 54  | 58  |
| P5_13       | 2.0        | 1.5        | <u>2.6</u> | 18.4        | 23.7        | 12.8        | <u>181</u> | 171        | 191        | <u>852</u> | <u>844</u> | <u>860</u> | <u>749</u> | 738        | <b>760</b> | 56        | 49  | 63  |

|       |            |            |            |             |             |             |            |            |            |            |            |            |            |            |            |           |    |           |
|-------|------------|------------|------------|-------------|-------------|-------------|------------|------------|------------|------------|------------|------------|------------|------------|------------|-----------|----|-----------|
| P5_14 | <u>1.9</u> | 1.7        | <u>2.2</u> | 18.3        | 23.3        | 13.2        | 180        | 166        | 192        | <u>848</u> | 834        | <u>862</u> | <u>743</u> | 728        | <b>757</b> | 60        | 51 | 67        |
| P5_15 | <u>1.7</u> | 1.9        | <u>1.6</u> | 18.6        | <u>24.4</u> | 13.0        | <u>182</u> | <u>179</u> | 185        | <u>850</u> | <u>843</u> | 857        | 719        | 725        | 711        | <b>64</b> | 60 | 69        |
| P5_16 | 3.7        | 2.0        | 5.1        | 18.9        | <u>27.0</u> | 10.5        | <u>184</u> | <u>179</u> | 192        | 846        | 831        | <u>861</u> | 737        | 713        | <b>758</b> | 61        | 49 | 72        |
| P5_17 | <u>1.5</u> | <u>1.2</u> | <u>1.8</u> | <u>19.7</u> | <u>25.2</u> | 13.9        | <u>183</u> | 166        | <u>198</u> | <u>848</u> | <u>838</u> | <u>859</u> | 739        | 729        | 747        | <b>64</b> | 58 | 70        |
| P5_18 | <u>1.5</u> | <u>1.1</u> | <u>1.9</u> | 17.1        | 21.7        | 12.4        | 177        | 160        | <u>193</u> | 845        | 825        | <u>864</u> | 733        | 722        | 745        | <b>63</b> | 54 | 71        |
| P5_19 | 2.4        | <u>1.2</u> | 3.6        | 17.5        | 23.2        | 11.8        | <u>185</u> | 168        | <u>201</u> | <u>848</u> | 835        | <u>862</u> | <u>741</u> | 717        | <b>769</b> | 59        | 53 | 65        |
| P5_2  | <u>1.9</u> | <u>1.2</u> | 2.7        | 18.8        | 23.3        | 14.0        | 177        | 164        | 188        | <u>851</u> | <u>841</u> | <u>862</u> | <u>746</u> | <u>739</u> | <b>752</b> | <b>65</b> | 61 | 68        |
| P5_20 | <u>1.3</u> | <u>1.2</u> | <u>1.5</u> | <u>20.4</u> | <u>26.4</u> | <u>14.7</u> | 175        | 170        | 181        | <u>848</u> | 838        | <u>859</u> | 732        | <u>742</u> | 721        | 61        | 54 | 68        |
| P5_3  | 2.0        | 1.7        | <u>2.4</u> | 17.1        | 18.8        | <u>15.3</u> | 178        | <u>180</u> | 175        | <u>853</u> | <u>844</u> | <u>861</u> | <u>743</u> | 731        | <b>756</b> | <b>62</b> | 52 | 71        |
| P5_4  | <u>1.5</u> | <u>1.3</u> | <u>1.6</u> | 18.6        | 23.8        | 13.6        | 177        | 168        | 185        | <u>852</u> | 835        | <u>869</u> | <u>741</u> | 726        | <b>754</b> | <b>66</b> | 51 | <b>81</b> |
| P5_5  | 2.1        | 2.4        | <u>1.8</u> | 18.9        | <u>24.8</u> | 13.3        | 175        | 166        | 187        | 838        | 822        | 853        | 719        | 714        | 720        | 61        | 55 | 67        |
| P5_6  | <u>1.5</u> | 1.5        | <u>1.4</u> | 19.1        | 23.8        | <u>14.6</u> | 178        | 170        | 188        | <u>854</u> | <u>843</u> | <u>865</u> | <u>759</u> | <u>739</u> | <b>777</b> | <b>62</b> | 59 | 65        |
| P5_7  | <u>1.2</u> | <u>1.3</u> | <u>1.4</u> | 18.5        | 23.5        | 13.7        | 177        | 168        | 187        | <u>849</u> | 830        | <u>868</u> | <u>749</u> | 729        | <b>766</b> | 61        | 47 | 75        |
| P5_8  | 3.2        | 2.6        | 3.7        | 19.2        | <u>25.3</u> | 13.0        | 182        | 156        | <u>208</u> | 839        | 813        | <u>865</u> | 739        | 730        | <b>750</b> | 54        | 48 | 59        |
| P5_9  | 2.8        | 2.4        | 3.2        | 18.8        | 22.3        | <u>15.4</u> | 170        | 163        | 178        | 835        | 817        | 853        | 734        | 717        | <b>749</b> | 60        | 57 | 63        |
| Pa_1  | 2.6        | 2.8        | <u>2.3</u> | <u>20.6</u> | <u>25.5</u> | <u>15.5</u> | 176        | 164        | 185        | 835        | 817        | 854        | 708        | 696        | 719        | 56        | 44 | 68        |
| Pa_2  | 3.1        | 3.1        | 2.9        | 18.3        | 23.4        | 13.6        | 179        | 167        | <u>193</u> | 845        | 830        | <u>860</u> | 737        | <u>740</u> | 732        | 57        | 53 | 61        |
| U1_1  | 2.6        | 2.7        | <u>2.3</u> | <u>19.9</u> | <u>24.6</u> | <u>15.2</u> | 187        | <u>184</u> | 191        | 840        | 825        | 855        | 734        | 727        | 742        | 55        | 50 | 60        |
| U1_10 | <u>1.9</u> | <u>1.3</u> | <u>2.3</u> | 18.0        | 22.7        | 13.3        | 185        | <u>179</u> | 189        | <u>849</u> | 837        | <u>862</u> | 738        | <u>735</u> | 743        | <b>64</b> | 59 | 69        |
| U1_11 | 2.2        | 1.6        | <u>2.5</u> | 19.0        | 23.2        | <u>15.1</u> | 181        | 162        | <u>200</u> | 845        | 830        | <u>861</u> | 726        | 713        | 736        | 59        | 51 | 67        |
| U1_12 | 2.5        | 2.5        | 2.8        | 18.8        | <u>24.2</u> | 13.4        | 187        | 174        | <u>202</u> | 846        | 830        | <u>862</u> | 734        | 720        | <b>751</b> | 56        | 52 | 60        |
| U1_13 | <u>1.7</u> | 1.7        | <u>1.7</u> | 18.6        | 22.4        | <u>14.7</u> | 171        | 168        | 176        | 833        | 815        | 852        | 730        | 711        | <b>748</b> | 55        | 48 | 61        |
| U1_2  | 4.0        | 4.3        | 3.8        | 17.4        | 21.8        | 13.3        | 183        | 172        | 191        | 842        | 824        | <u>859</u> | 731        | 713        | 747        | 53        | 47 | 58        |
| U1_3  | <u>1.6</u> | 1.7        | <u>1.9</u> | 19.1        | 23.8        | 14.5        | 182        | 172        | <u>193</u> | 841        | 827        | 856        | 740        | 721        | <b>762</b> | 47        | 46 | 49        |
| U1_4  | 2.5        | 1.9        | 2.9        | 19.3        | <u>25.2</u> | 13.3        | 182        | <u>178</u> | 188        | <u>848</u> | 832        | <u>863</u> | 736        | 722        | 747        | <b>62</b> | 56 | 67        |
| U1_5  | 2.1        | 2.1        | <u>1.8</u> | 17.8        | 23.0        | 12.4        | <u>182</u> | 172        | 191        | 836        | 823        | 849        | 710        | 710        | 710        | 50        | 49 | 52        |
| U1_6  | 2.6        | 2.6        | <u>2.3</u> | <u>21.1</u> | <u>26.6</u> | <u>15.4</u> | 174        | 166        | 185        | 841        | 829        | 852        | 729        | 709        | 747        | 57        | 53 | 62        |
| U1_7  | 2.3        | 2.2        | <u>2.3</u> | 19.0        | <u>24.9</u> | 12.9        | 176        | 165        | 187        | 836        | 813        | <u>859</u> | 727        | 727        | 726        | 53        | 43 | 63        |
| U1_8  | 2.7        | 2.8        | 2.9        | <u>19.8</u> | <u>24.3</u> | <u>15.4</u> | 177        | 171        | 186        | 838        | 823        | 854        | 713        | 709        | 719        | 60        | 56 | 64        |
| U1_9  | <u>1.6</u> | 1.9        | <u>1.9</u> | 18.2        | 23.0        | 13.4        | 175        | 156        | <u>194</u> | 846        | 826        | <u>865</u> | 730        | <u>736</u> | 721        | 59        | 47 | 73        |

|        |         |         |         |             |             |             |            |            |            |         |         |            |         |            |            |         |      |         |
|--------|---------|---------|---------|-------------|-------------|-------------|------------|------------|------------|---------|---------|------------|---------|------------|------------|---------|------|---------|
| U2_1   | 3.9     | 2.4     | 4.9     | 19.2        | <u>24.2</u> | 14.3        | <u>185</u> | 172        | <u>196</u> | 844     | 826     | <u>862</u> | 736     | 718        | <b>755</b> | 54      | 47   | 61      |
| U2_2   | 3.2     | 3.8     | 2.8     | 19.1        | 22.6        | <u>15.2</u> | 175        | 169        | 180        | 834     | 822     | 846        | 728     | 728        | 726        | 54      | 47   | 61      |
| U2_3   | 3.2     | 3.1     | 3.4     | <u>20.6</u> | <u>26.2</u> | <u>14.9</u> | <u>183</u> | 166        | <u>198</u> | 841     | 818     | <u>863</u> | 739     | <u>737</u> | 745        | 53      | 44   | 61      |
| U2_4   | 3.1     | 2.3     | 4.1     | 17.7        | 22.2        | 13.4        | 172        | 161        | 182        | 833     | 815     | 852        | 728     | 731        | 724        | 58      | 55   | 62      |
| U2_5   | 3.7     | 3.7     | 3.9     | <u>21.3</u> | <u>24.7</u> | <u>17.1</u> | 179        | <u>175</u> | 181        | 838     | 827     | 849        | 720     | 731        | 713        | 53      | 46   | 61      |
| U2_6   | 2.7     | 2.7     | 3.2     | <u>20.2</u> | <u>26.2</u> | 13.9        | <u>181</u> | 171        | 189        | 841     | 826     | 856        | 747     | <u>748</u> | <b>750</b> | 57      | 52   | 62      |
| U2_7   | 3.4     | 3.2     | 3.7     | <u>20.3</u> | <u>24.2</u> | <u>16.2</u> | 177        | 173        | 183        | 838     | 819     | 857        | 718     | 698        | 736        | 56      | 48   | 65      |
| U2_8   | 3.5     | 2.7     | 4.3     | <u>20.9</u> | <u>24.5</u> | <u>17.2</u> | <u>184</u> | <u>176</u> | 192        | 841     | 830     | 852        | 729     | 715        | 746        | 54      | 51   | 58      |
| Mean   | 2.5     | 2.2     | 2.8     | 19.0        | 23.9        | 14.2        | 179        | 169        | 189        | 842     | 827     | 858        | 731     | 722        | 740        | 58      | 51   | 64      |
| LSD 5% | 0.8     | 0.9     | 1.3     | 1.9         | 2.9         | 2.7         | 10         | 12         | 16         | 7       | 9       | 12         | 19      | 26         | 30         | 5       | -    | 6       |
| P      | > 0.001 | > 0.001 | > 0.001 | > 0.001     | 0.002       | > 0.001     | 0.08       | 0.06       | 0.02       | > 0.001 | > 0.001 | 0.03       | > 0.001 | 0.05       | > 0.001    | > 0.001 | 0.33 | > 0.001 |
